# Supplementary material
Source: PubMed Central journal article supplement (PMC5023514)
Supplement: mol-22-15_242_vanderMeer_Suppl.pdf [file mol-22-15_242_vanderMeer_Suppl.pdf]

## Supplemental Data

# Toll-Like Receptor 9 Enhances Bacterial Clearance and Limits Lung Consolidation in Murine Pneumonia Caused by Methicillin-Resistant *Staphylococcus aureus*

Anne Jan van der Meer,<sup>1</sup> Achmed Achouiti,<sup>1</sup> Arie van de Ende,<sup>2</sup> Aicha Ait Soussan,<sup>5</sup> Sandrine Florquin,<sup>3</sup> Alex de Vos,<sup>1</sup> Sacha S Zeerleder,<sup>4,5</sup> and Tom van der Poll<sup>1,6</sup>

Online address: <http://www.molmed.org>

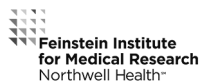

**Supplementary Table S1.** *Tlr9*<sup>-/-</sup> mice showed increase in both macrophage and lymphocyte counts compared with Wt mice after 48 h.

| Timepoint | Group <sup>a</sup>         | Macrophages <sup>b</sup>   | Lymphocytes <sup>b</sup>   |
|-----------|----------------------------|----------------------------|----------------------------|
| 6 h       | Wt                         | 0.2 (0.3–0.5)              | 0.1 (0.0–0.1)              |
|           | <i>tlr9</i> <sup>-/-</sup> | 0.2 (0.2–0.2)              | 0.1 (0.1–0.2)              |
| 24 h      | Wt                         | 0.8 (1.7–3.3)              | 0.4 (0.2–0.8)              |
|           | <i>tlr9</i> <sup>-/-</sup> | 2.0 (2.7–3.8)              | 0.4 (0.3–1.7)              |
| 48 h      | Wt                         | 3.0 (1.6–3.6)              | 0.5 (0.2–0.7)              |
|           | <i>tlr9</i> <sup>-/-</sup> | 4.6 (5.2–9.5) <sup>c</sup> | 1.3 (1.0–1.6) <sup>d</sup> |
| 78 h      | Wt                         | 15 (21–35)                 | 5.0 (4.1–16)               |
|           | <i>tlr9</i> <sup>-/-</sup> | 19 (10.49)                 | 4.5 (1.9–12)               |

<sup>a</sup>Wt and *tlr9*<sup>-/-</sup> mice were infected with  $1 \times 10^7$  MRSA bacteria via intranasal inoculation and euthanized at the indicated time points thereafter.

<sup>b</sup>Macrophages and lymphocytes are reported per 10,000 cells per milliliter in BALF as the median, lower quartile and upper quartile ( $n = 8$  mice per group at each time point).

<sup>c</sup> $p < 0.001$  versus Wt mice at the same time point.

<sup>d</sup> $p < 0.01$  versus Wt mice at the same time point.
